# Supplementary material for: Candidemia among Hospitalized Pediatric Patients Caused by Several Clonal Lineages of Candida parapsilosis
Source: MDPI journal article supplement (doi:10.3390/jof8020183), 2022-02-12
Supplement: s1 [file s1]

**Supplementary Table S3.** Antifungal susceptibility data and Fks1 and Erg11 profiles.

| Isolates #     | Species                 | AFLP Genotype | MIC medians (range), mg/L |               |           |                |                   | <i>ERG11</i> SNPs<br>(amino acid substitution) | HS1 <i>FKS1</i> | HS2 <i>FKS2</i> | Details                                     |
|----------------|-------------------------|---------------|---------------------------|---------------|-----------|----------------|-------------------|------------------------------------------------|-----------------|-----------------|---------------------------------------------|
|                |                         |               | FLC                       | VRC           | MIC       | AND            | AMB               |                                                |                 |                 |                                             |
| Multiple       | <i>C. parapsilosis</i>  | G1-P          | 0.5 (0.25–2)              | ≤0.03 (≤0.03) | 2 (1-2)   | 1 (0.5-4)      | 0.125 (0.06–0.5)  | WT                                             | FLTSLRDA        | DWIRRYTL        | 35 isolates, 31 patients, 18 Alive, 13 died |
|                |                         |               |                           |               |           |                |                   |                                                |                 |                 |                                             |
| 650, 685, 811  | <i>C. parapsilosis</i>  | G2-P          | 1 (0.5–1)                 | ≤0.03 (≤0.03) | 1 (1-2)   | 1 (0.5-2)      | 0.125 (0.125)     | WT                                             | FLTSLRDA        | DWIRRYTL        | 3 isolates, 3 patients, 2 Alive, 1 died     |
|                |                         |               |                           |               |           |                |                   |                                                |                 |                 |                                             |
| 82             | <i>C. parapsilosis</i>  | G1-P          | 0.5                       | ≤0.03         | 1         | 1              | 0.125             | T905C (I302T)                                  | FLTSLRDA        | DWIRRYTL        | Died                                        |
| 362            | <i>C. parapsilosis</i>  | G1-P          | 0.25                      | ≤0.03         | 1         | 1              | 0.25              | G397T (D133Y)                                  | FLTSLRDA        | DWIRRYTL        | Died                                        |
| 125            | <i>C. parapsilosis</i>  | G1-P          | 0.5                       | ≤0.03         | 2         | 2              | 0.125             | C748A (Q250K), G1193T (R398I)                  | FLTSLRDA        | DWIRRYTL        | Died                                        |
| 254* & 291*    | <i>C. parapsilosis</i>  | G1-P          | 0.5–1                     | ≤0.03         | 1         | 0.5            | 0.125             | WT                                             | FLTSLRDA        | DWIRRYTL        | Alive                                       |
| 229*           | <i>C. parapsilosis</i>  | G1-P          | 0.5                       | ≤0.03         | 2         | 0.5            | 0.25              | G397T (D133Y)                                  | FLTSLRDA        | DWIRRYTL        | Alive                                       |
| 185**, 241**   | <i>C. parapsilosis</i>  | G1-P          | 0.5                       | ≤0.03         | 2         | 2              | 0.125             | WT                                             | FLTSLRDA        | DWIRRYTL        | Died                                        |
| 103**          | <i>C. parapsilosis</i>  | G1-P          | 1                         | ≤0.03         | 2         | 1              | 0.125             | C748A (Q250K)                                  | FLTSLRDA        | DWIRRYTL        | Died                                        |
|                |                         |               |                           |               |           |                |                   |                                                |                 |                 |                                             |
| 293***, 296*** | <i>C. parapsilosis</i>  | G2-P          | 0.25–0.5                  | ≤0.03         | 1-2       | 1→2            | 0.125–0.25        | G1193T (R398I)                                 | FLTSLRDA        | DWIRRYTL        | Alive                                       |
| 265            | <i>C. parapsilosis</i>  | G2-P          | 1                         | ≤0.03         | 2         | 2              | 0.25              | G1193T (R398I)                                 | FLTSLRDA        | DWIRRYTL        | Died                                        |
|                |                         |               |                           |               |           |                |                   |                                                |                 |                 |                                             |
| 147, 187, 496  | <i>C. orthopsilosis</i> | G1-Orth       | 0.25 (0.25–0.5)           | ≤0.03 (≤0.03) | 0.5 (0.5) | 0.5 (0.5)      | 0.06 (0.06–0.125) | WT                                             | FLTSLRDA        | DWVRRYTL        | 3 isolates, 2 patients, all alive           |
|                |                         |               |                           |               |           |                |                   |                                                |                 |                 |                                             |
| 606, 617, 618  | <i>C. orthopsilosis</i> | G2-Orth       | 0.5 (0.25–2)              | ≤0.03 (≤0.03) | 0.5 (0.5) | 0.5 (0.25–0.5) | 0.06 (0.06–0.125) | WT                                             | FLTSLRDA        | DWVRRYTL        | 3 isolates, 3 patients, all alive           |

WT: Wild-type. SNP: single nucleotide polymorphism. All of the *ERG11* sequences harbored the silent T591C mutation

\*, \*\*, \*\*\*, and \*\*\*\* These isolates were recovered from a single patient.

G1-P and G2-P represent genotypes 1 and 2 of *C. parapsilosis*. while G1orth and G2orth represent genotypes 1 and 2 of *C. orthopsilosis*.

### **Deposition of isolates and sequence data**

Six *C. orthopsilosis* isolates obtained from this study were deposited in the CBS yeast culture collection hosted at the Westerdijk Fungal Biodiversity Institute, Utrecht, the Netherlands, with the accession numbers CBS 15856–CBS 15861. Sequences obtained for *ERG11* (MK521929–MK521979) and HS1 and HS2 of *FKS1* (MK522274–MK522386) were deposited in GenBank.
