# Supplementary material for: Candidemia among Hospitalized Pediatric Patients Caused by Several Clonal Lineages of Candida parapsilosis
Source: MDPI journal article supplement (doi:10.3390/jof8020183), 2022-02-12
Supplement: s1 [file s1]

Supplementary Figures

Figure S1. AFLP fingerprinting of included isolates.

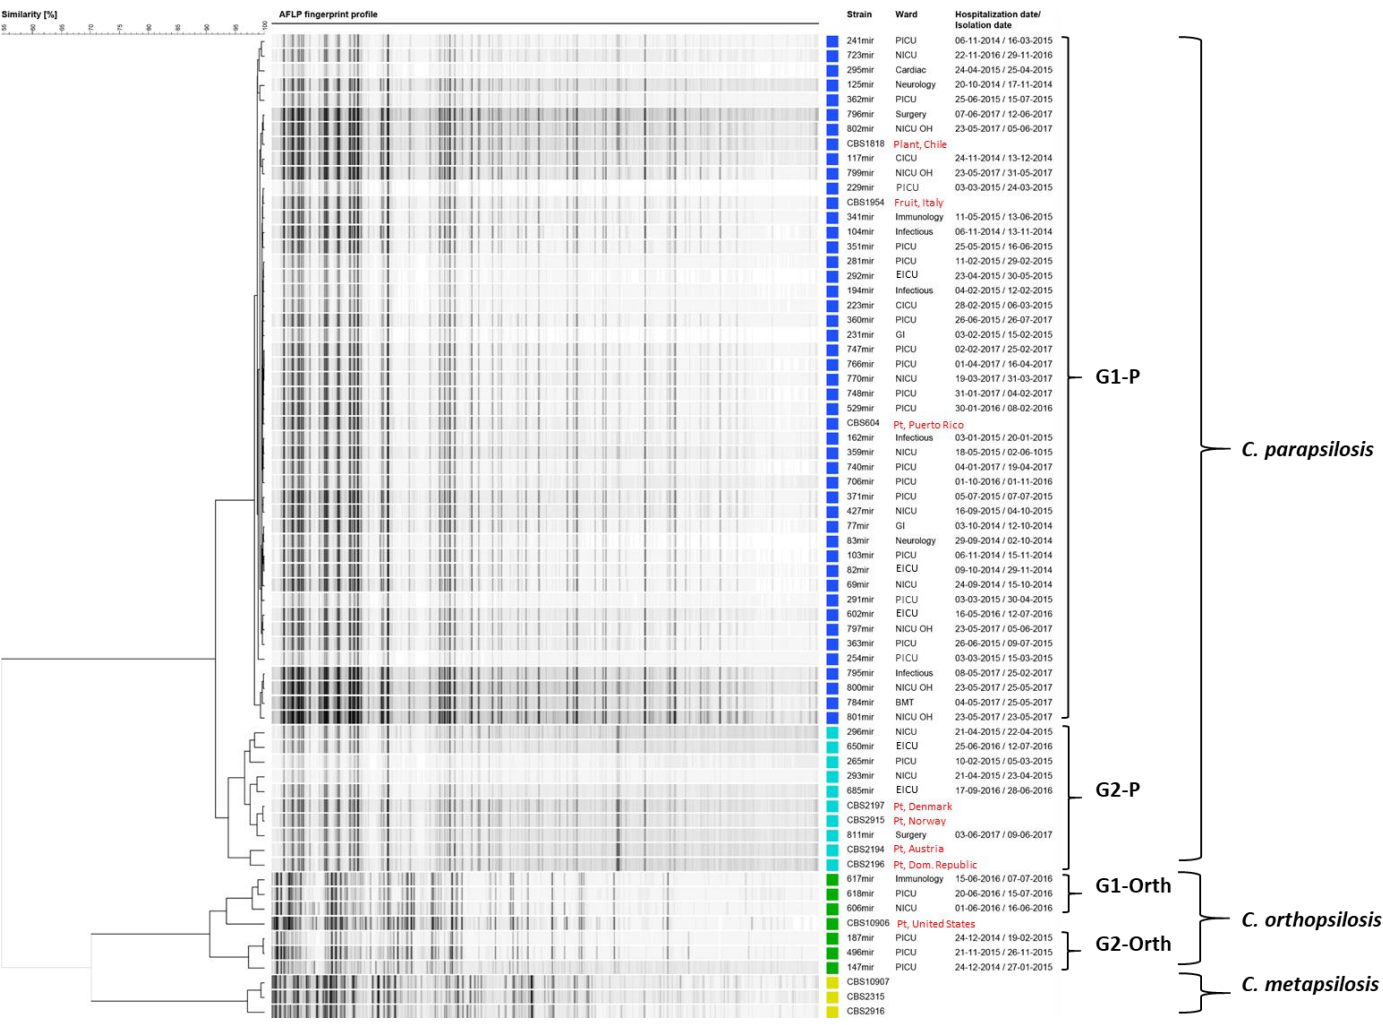

**Figure S1.** Amplified Fragment Length Polymorphism (AFLP) fingerprinting of *C. parapsilosis* complex species [1]. Colors indicate the different AFLP clusters, G1-P and G2-P for *C. parapsilosis* and G1-Orth and G2-Orth for *C. orthopsilosis*, respectively. Reference strains (CBS) are included and origins are provided in red text. Pt: patient, ICU: Intensive care unit, PICU: Pediatric ICU, NICU: Neonatal ICU, NICU-OH: NICU Open Heart Surgery, CICU: Cardiac ICU, EICU: Emergency ICU, GI: Gastroenterology, BMT: Bone marrow transplant.

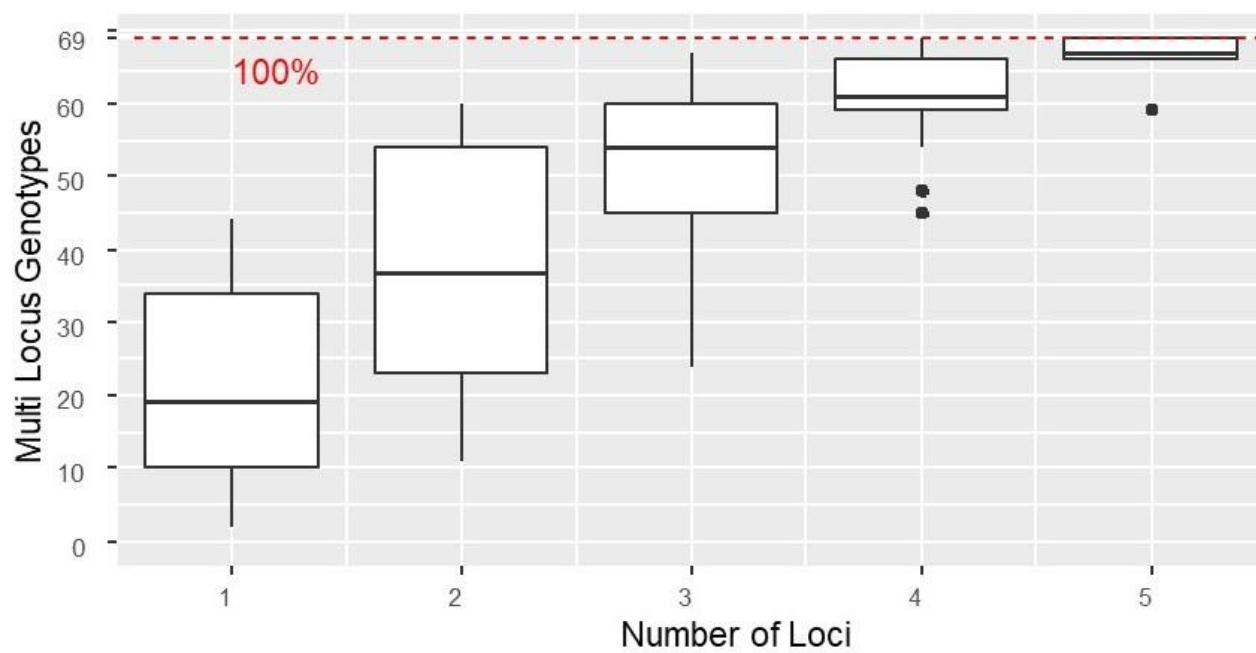

**Figure S2.** Genotype accumulation curve. For each boxplot, the six loci were randomly sampled 1000 times. A plateau was reached with the six loci.

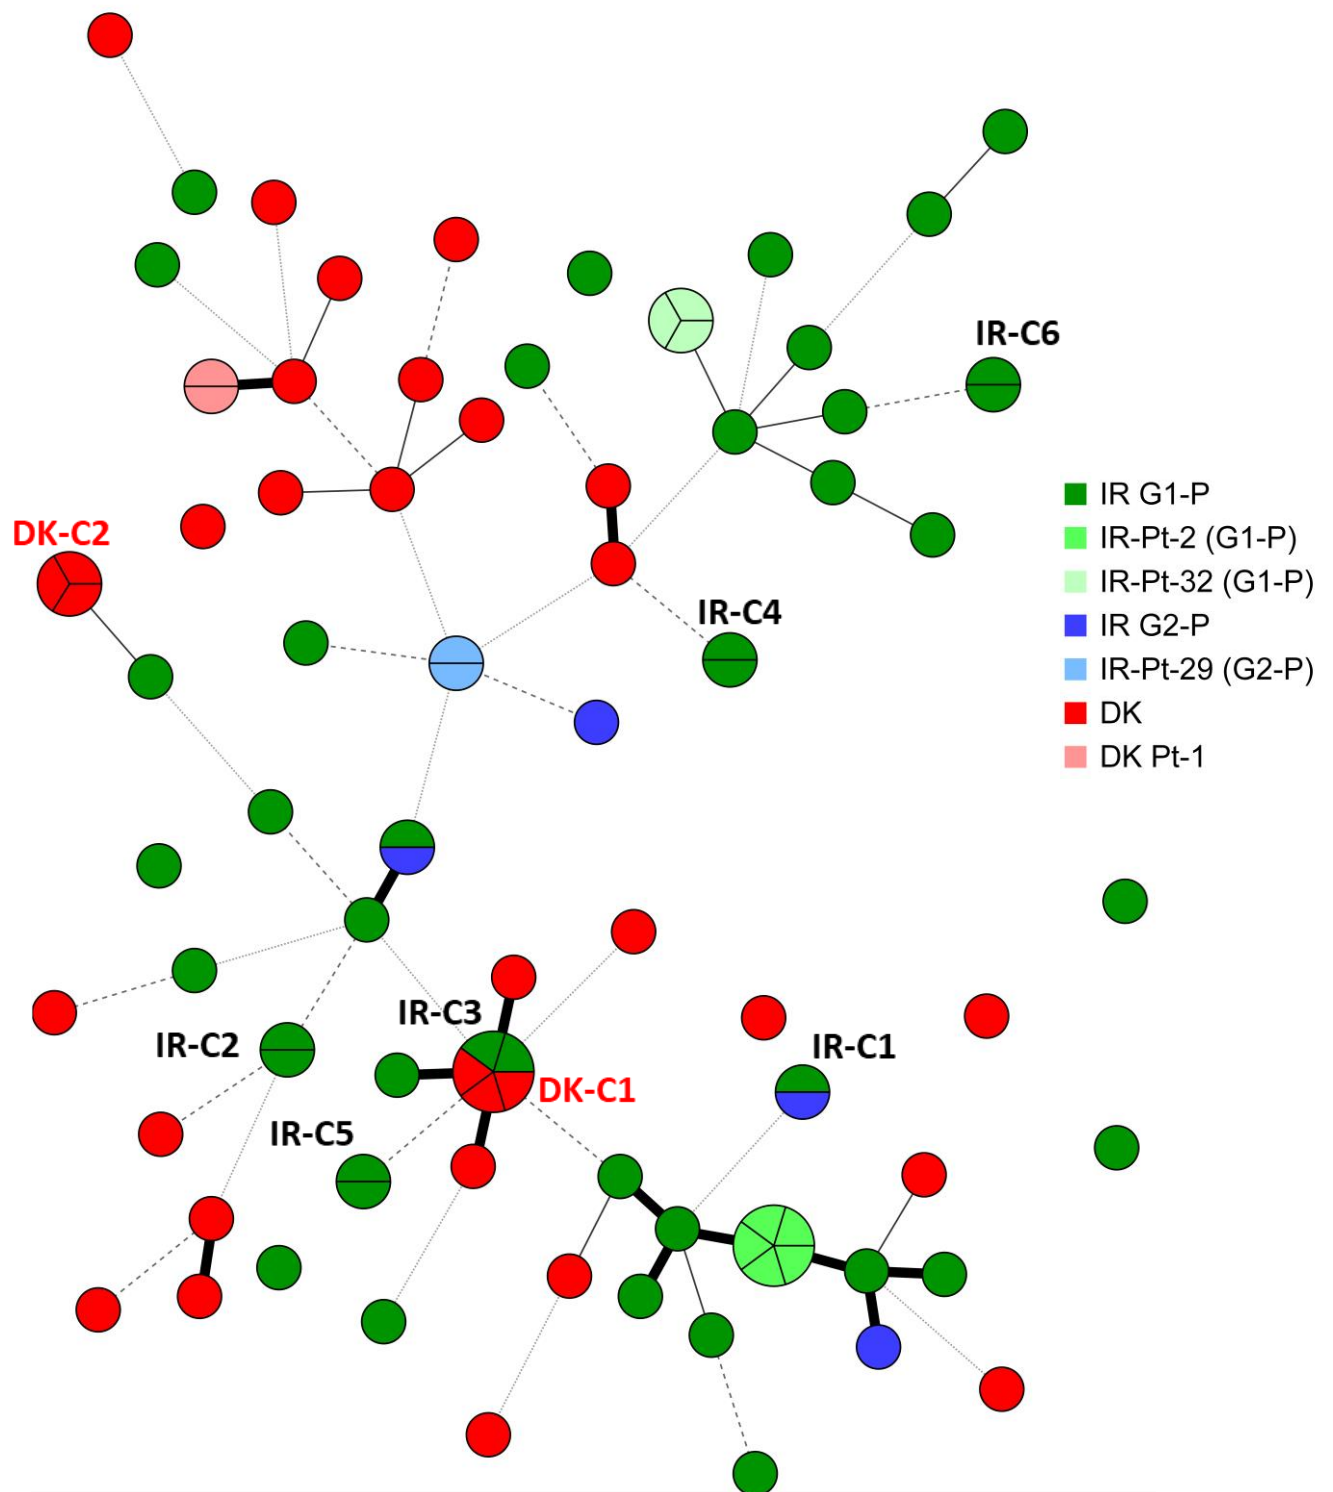

**Figure S3.** Microsatellite typing [2] of Danish and Iranian isolates visualized as a minimum spanning tree in BioNumerics v7.6. Green colors represent *C. parapsilosis* isolates belonging to AFLP cluster G1-P, blue is AFLP cluster G2-P strains and red are Danish isolates. There are six Iranian clusters and two Danish clusters involving different patients. No apparent correlation between AFLP fingerprints and microsatellite genotypes was observed.

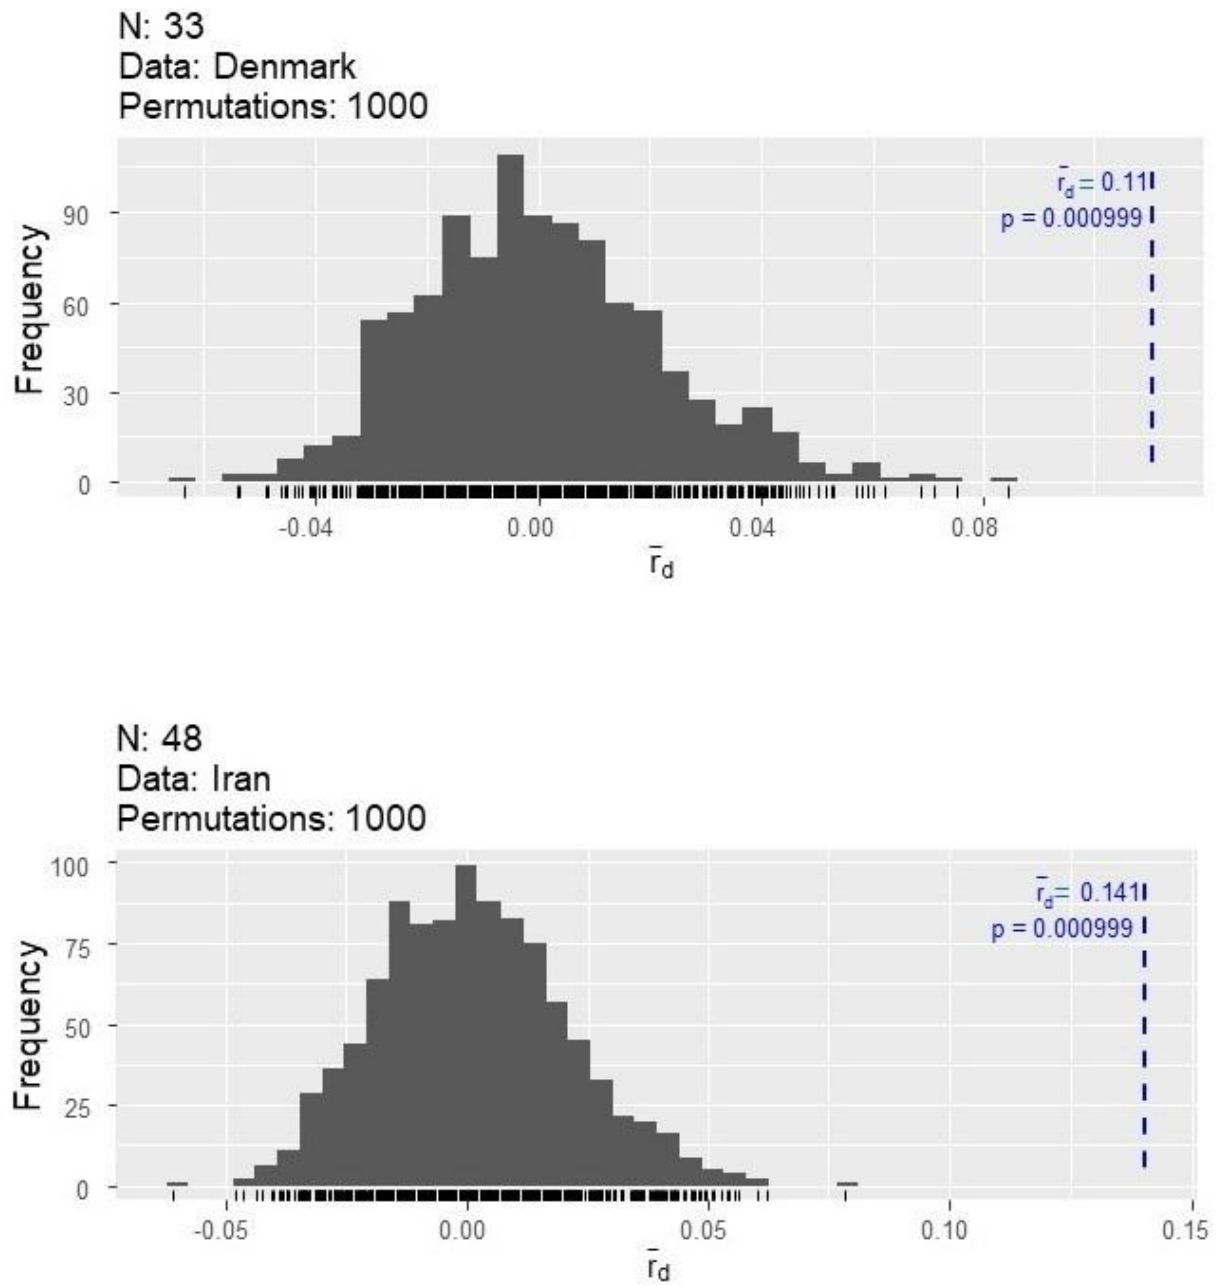

**Figure S4.** Test for linkage disequilibrium among the loci from the Danish and Iranian isolates of *Candida parapsilosis*. The  $\bar{r}_d$  index accounts for the number of loci sampled, and is less biased than Index of Association. The low  $P$  values reject the null hypothesis of no linkage among markers.

1. Arastehfar A, Khodavaisy S, Daneshnia F, Najafzadeh M-J, Mahmoudi S, Charsizadeh A, et al. Molecular Identification, Genotypic Diversity, Antifungal Susceptibility, and Clinical Outcomes of Infections Caused by Clinically Underrated Yeasts, *Candida orthopsilosis*, and *Candida metapsilosis*: An Iranian Multicenter Study (2014–2019). *Front Cell Infect Microbiol.* **2019**;9(July). DOI: 10.3389/fcimb.2019.00264
2. Diab-Elschahawi M, Forstner C, Hagen F, Meis JF, Lassnig AM, Presterl E, et al. Microsatellite genotyping clarified conspicuous accumulation of *Candida parapsilosis* at a cardio-thoracic surgery intensive care unit. *J Clin Microbiol.* **2012**;50(August):3422–6. DOI: 10.1128/JCM.01179-12
