# Supplementary material for: Candidemia among Hospitalized Pediatric Patients Caused by Several Clonal Lineages of Candida parapsilosis
Source: MDPI journal article supplement (doi:10.3390/jof8020183), 2022-02-12
Supplement: s1 [file s1]

**Supplementary Table S1.** Clinical data of patients included in this study.

| Patient No | Age/sex | Weight (kg) | Ward         | Underlying disease     | Admission date | <i>Candida</i> isolation date | Isolation day after admission | CVC | TPN | Intubation and MV | Foley catheter | surgery | colonization | Neutropenia | Corticosteroid therapy | chemotherapy | <i>Candida</i> species | Duration of antifungal therapy | Outcome | Strain No                |
|------------|---------|-------------|--------------|------------------------|----------------|-------------------------------|-------------------------------|-----|-----|-------------------|----------------|---------|--------------|-------------|------------------------|--------------|------------------------|--------------------------------|---------|--------------------------|
| 1          | 4y/F    | 16.2        | Surgery      | Genetic disorder       | 03.06.2017     | 09.06.2017                    | day 6                         | -   | -   | -                 | +              | +       | -            | -           | -                      | -            | <i>C. parap</i>        | 15 d                           | Alive   | 811                      |
| 2          | 12d/M   | 3.1         | NICU-OH      | CHD                    | 23.05.2017     | 23.05.2017                    | day 1                         | +   | +   | +                 | +              | +       | -            | -           | -                      | -            | <i>C. parap</i>        | 20 d                           | Died    | 797, 799, 800, 801 & 802 |
| 3          | 11m/F   | 10.7        | Abd. surgery | Foreign body ingestion | 07.06.2017     | 12.06.2017                    | day 5                         | +   | +   | +                 | -              | +       | +            | -           | -                      | -            | <i>C. parap</i>        | 15 d                           | Died    | 796                      |
| 4          | 7m/M    | 6.45        | ID           | Immunodeficiency       | 08.05.2017     | 25.02.2017                    | day 17                        | -   | -   | -                 | -              | -       | +            | +           | -                      | -            | <i>C. parap</i>        | 21 d                           | Alive   | 795                      |
| 5          | 1y/M    | 7.2         | BMT          | SCID (HSCT)            | 04.05.2017     | 25.05.2017                    | day 21                        | +   | -   | +                 | +              | +       | +            | -           | +                      | -            | <i>C. parap</i>        | Under treatment                | Died    | 784                      |
| 6          | 3d/M    | 2.9         | NICU         | Ichthyosis vulgaris    | 19.03.2017     | 31.03.2017                    | day 12                        | +   | +   | +                 | -              | -       | +            | -           | -                      | -            | <i>C. parap</i>        | 12 d                           | Died    | 770                      |
| 7          | 10y/F   | 30.0        | PICU         | Wolfram syndrome       | 01.04.2017     | 16.04.2017                    | day 15                        | +   | -   | -                 | +              | +       | -            | -           | -                      | -            | <i>C. parap</i>        | 7 d under treatment            | Died    | 766                      |
| 8          | 8y/F    | 21.0        | PICU         | Cystic fibrosis        | 31.01.2017     | 04.02.2017                    | day 4                         | +   | -   | +                 | -              | -       | +            | -           | -                      | -            | <i>C. parap</i>        | 12 d                           | Alive   | 748                      |
| 9          | 3y/M    | 13.8        | PICU         | ALL                    | 02.02.2017     | 25.02.2017                    | day 23                        | +   | -   | -                 | -              | -       | -            | +           | -                      | +            | <i>C. parap</i>        | 21 d                           | Alive   | 747                      |
| 10         | 5y/F    | 16.5        | PICU         | Metabolic disease      | 04.01.2017     | 19.04.2017                    | day 16                        | +   | -   | +                 | -              | +       | -            | -           | -                      | -            | <i>C. parap</i>        | 14 d                           | Alive   | 740                      |
| 11         | 16d/M   | 1.4         | NICU         | Prematurity            | 22.11.2016     | 29.11.2016                    | day 7                         | +   | +   | +                 | -              | -       | -            | -           | -                      | -            | <i>C. parap</i>        | 10 d                           | Alive   | 723                      |

|    |       |      |            |                          |            |            |        |   |   |   |   |   |   |   |   |   |                        |                      |       |     |
|----|-------|------|------------|--------------------------|------------|------------|--------|---|---|---|---|---|---|---|---|---|------------------------|----------------------|-------|-----|
| 12 | 2y/F  | 11.1 | PICU       | Metabolic disease        | 01.10.2016 | 01.11.2016 | day 30 | + | + | - | - | - | - | - | - | - | <i>C. parap</i>        | 7 d under treatment  | Died  | 706 |
| 13 | 4y/F  | 14.5 | EICU       | Metabolic disease        | 17.09.2016 | 28.06.2016 | day 11 | + | + | + | + | - | + | - | - | - | <i>C. parap</i>        | 3 d under treatment  | Died  | 685 |
| 14 | 2y/F  | 11.9 | EICU       | ALL                      | 25.06.2016 | 12.07.2016 | day 17 | + | + | + | - | - | - | + | - | + | <i>C. parap</i>        | 14 d                 | Alive | 650 |
| 15 | 7y/M  | 23.0 | PICU       | Lymphoma                 | 20.06.2016 | 15.07.2016 | day 45 | + | - | + | + | - | - | - | - | - | <i>C. ortho</i>        | 17 d                 | Alive | 618 |
| 16 | 1y/F  | 7.2  | Immunology | Immunodeficiency         | 15.06.2016 | 07.07.2016 | day 22 | + | - | + | - | - | - | + | - | - | <i>C. ortho</i>        | 14 d                 | Alive | 617 |
| 17 | 1m/M  | 2.2  | NICU       | Prematurity              | 01.06.2016 | 16.06.2016 | day 15 | + | + | + | - | - | - | - | - | - | <i>C. ortho</i>        | 15 d                 | Alive | 606 |
| 18 | 5m/F  | 3.5  | EICU       | prematurity              | 16.05.2016 | 12.07.2016 | day 57 | + | + | + | - | + | - | - | - | - | <i>C. parap</i>        | 12 d under treatment | Died  | 602 |
| 19 | 2m/M  | 3.95 | PICU       | Antenatal Hydronephrosis | 30.01.2016 | 08.02.2016 | day 9  | + | - | - | + | + | + | - | - | - | <i>C. parap</i>        | 14 d                 | Alive | 529 |
| 20 | 8y/M  | 21.0 | PICU       | Hyper IgM syndrome       | 21.11.2015 | 26.11.2015 | day 5  | + | - | + | - | - | + | + | - | - | <b><i>C. ortho</i></b> | 18 d                 | Alive | 496 |
| 21 | 18d/M | 1.95 | NICU       | Prematurity              | 16.09.2015 | 04.10.2015 | day 16 | + | + | + | - | + | - | - | - | - | <i>C. parap</i>        | 12 d                 | Alive | 427 |
| 22 | 4m/M  | 3.8  | PICU       | Prematurity              | 05.07.2015 | 07.07.2015 | day 3  | + | + | + | - | - | - | - | + | - | <i>C. parap</i>        | 3 d under treatment  | Died  | 371 |
| 23 | 2d/M  | 3.1  | NICU       | Epidermolysis bullosa    | 26.06.2015 | 09.07.2015 | day 13 | + | + | - | - | - | + | - | - | - | <i>C. parap</i>        | 14 d                 | Alive | 363 |

|    |       |      |            |                                      |            |            |        |   |   |   |   |   |   |   |   |   |                 |                     |       |                |
|----|-------|------|------------|--------------------------------------|------------|------------|--------|---|---|---|---|---|---|---|---|---|-----------------|---------------------|-------|----------------|
| 24 | 20d/F | 1.9  | PICU       | Prematurity                          | 25.06.2015 | 15.06.2015 | day 25 | + | + | + | - | - | - | - | - | - | <i>C. parap</i> | 3 d under treatment | Died  | 362            |
| 25 | 3m/M  | 5.7  | PICU       | VACTERL                              | 26.06.2015 | 26.07.2015 | day 30 | + | - | + | - | + | + | - | - | - | <i>C. parap</i> | 8 d under treatment | Died  | 360            |
| 26 | 5d/F  | 3.4  | NICU       | AML                                  | 18.05.2015 | 02.06.2015 | day 14 | + | + | - | - | - | - | + | - | + | <i>C. parap</i> | 6 d under treatment | Died  | 359            |
| 27 | 1y/M  | 7.9  | PICU       | Prematurity                          | 25.05.2015 | 16.06.2015 | day 22 | + | + | + | - | + | + | - | - | - | <i>C. parap</i> | Under treatment     | Died  | 351            |
| 28 | 11m/M | 8.2  | Immunology | SCID                                 | 11.05.2015 | 13.06.2015 | day 43 | + | + | - | - | - | + | + | - | - | <i>C. parap</i> | 15 d                | Alive | 341            |
| 29 | 16d/M | 1.73 | NICU       | Prematurity                          | 21.04.2015 | 22.04.2015 | day 2  | + | - | + | + | + | + | - | - | - | <i>C. parap</i> | AMB 3 d<br>CAS 10 d | Alive | 293 & 296      |
| 30 | 10m/F | 7.0  | CICU       | CHD                                  | 24.04.2015 | 25.04.2015 | day 2  | + | - | + | - | + | - | - | - | - | <i>C. parap</i> | 7 d under treatment | Died  | 295            |
| 31 | 2y/M  | 13.0 | EICU       | Brain tumor                          | 23.04.2015 | 30.5.2015  | day 37 | + | + | + | + | + | - | - | + | + | <i>C. parap</i> | 7 d under treatment | Died  | 292            |
| 32 | 4y/M  | 13.5 | PICU       | Hyper IgE syndrome                   | 03.03.2015 | 24.03.2015 | day 21 | + | - | + | + | - | + | - | - | - | <i>C. parap</i> | AMB 3 d<br>CAS 10 d | Alive | 229, 254 & 291 |
| 33 | 1y/F  | 11.7 | PICU       | Charcot-Marie-tooth disease          | 11.02.2015 | 29.02.2015 | day 18 | + | - | + | - | + | + | - | - | - | <i>C. parap</i> | 6 d under treatment | Died  | 281            |
| 34 | 1y/M  | 12.2 | PICU       | Encephalopathy following MMR vaccine | 10.02.2015 | 05.03.2015 | day 23 | - | + | - | + | - | + | - | + | - | <i>C. parap</i> | 21 d                | Died  | 265            |
| 35 | 4m/M  | 4.8  | GI         | Cystic fibrosis                      | 03.02.2015 | 15.02.2015 | day 12 | + | - | + | - | - | + | - | - | - | <i>C. parap</i> | 3 d under treatment | Died  | 231            |
| 36 | 1m/F  | 4.2  | CICU       | Tuberous Sclerosis                   | 28.02.2015 | 06.03.2015 | day 6  | + | - | + | - | + | + | - | - | - | <i>C. parap</i> | 10 d                | Alive | 223            |

|    |       |      |           |                                      |            |            |        |   |   |   |   |   |   |   |   |   |                 |                     |       |                |
|----|-------|------|-----------|--------------------------------------|------------|------------|--------|---|---|---|---|---|---|---|---|---|-----------------|---------------------|-------|----------------|
| 37 | 2y/F  | 11.9 | ID        | Intramedullary spinal cord tumor     | 04.02.2015 | 12.02.2015 | day 8  | + | - | - | - | + | - | + | - | + | <i>C. parap</i> | 14 d                | Alive | 194            |
| 38 | 3m/F  | 3.0  | ID        | Prematurity                          | 03.01.2015 | 20.01.2015 | day 12 | + | + | + | - | - | + | - | - | - | <i>C. parap</i> | 10 d                | Alive | 162            |
| 39 | 3y/F  | 13.5 | PICU      | ALL                                  | 24.12.2014 | 27.01.2015 | day 32 | + | - | + | - | + | - | + | + | + | <i>C. ortho</i> | 12 d                | Alive | 187            |
| 40 | 3m/F  | 5,85 | Neurology | Neuroblastoma                        | 20.10.2014 | 17.11.2014 | day 28 | - | + | - | + | - | - | + | - | + | <i>C. parap</i> | 8 d under treatment | Died  | 125            |
| 41 | 6y/F  | 17.5 | CICU      | CHD                                  | 24.11.2014 | 13.12.2014 | day 19 | + | + | + | + | + | + | - | - | - | <i>C. parap</i> | 3 d under treatment | Died  | 117            |
| 42 | 4m/M  | 6.15 | ID        | Post meningitis encephalopathy       | 06.11.2014 | 13.11.2014 | day 7  | - | + | - | - | - | + | - | - | - | <i>C. parap</i> | 14 d                | Alive | 104            |
| 43 | 3m/M  | 2.75 | PICU      | Metabolic disease                    | 06.11.2014 | 15.11.2014 | day 9  | + | + | + | - | + | - | + | + | - | <i>C. parap</i> | 10 d                | Died  | 103, 185 & 241 |
| 44 | 1y/M  | 12.3 | Neurology | Encephalopathy following MMR vaccine | 29.09.2014 | 02.10.2014 | day 3  | + | - | + | - | + | - | - | - | - | <i>C. parap</i> | -                   | Died  | 83             |
| 45 | 5m/F  | 4.1  | EICU      | Prematurity                          | 09.10.2014 | 29.11.2014 | day 51 | + | + | + | - | + | - | - | + | - | <i>C. parap</i> | 4 d under treatment | Died  | 82             |
| 46 | 1y/F  | 9.85 | GI        | Prematurity                          | 03.10.2014 | 12.10.2014 | day 9  | + | + | - | - | + | + | - | - | - | <i>C. parap</i> | 14 d                | Alive | 77             |
| 47 | 28d/F | 2.9  | NICU      | Metabolic disease/prematurity        | 24.09.2014 | 15.10.2014 | day 22 | + | + | + | - | - | - | - | - | - | <i>C. parap</i> | 12 d                | Alive | 69             |

Abbreviations: CVC: central venous catheter, TPN: total parenteral nutrition, MV: Mechanical ventilation, y: year, m: months, d, days, M: male, F: female, Abd.: Abdominal, ICU: Intensive care unit, PICU: Pediatric ICU, NICU: Neonatal ICU, NICU-OH: NICU Open Heart Surgery, CICU: Cardiac ICU, EICU: Emergency ICU, ID: Infectious diseases, GI: Gastroenterology, BMT: Bone marrow transplant, CHD: Coronary Heart Disease., AMB: Amphotericin B, CAS: Caspofungin,
