# Supplementary material for: Candidemia among Hospitalized Pediatric Patients Caused by Several Clonal Lineages of Candida parapsilosis
Source: MDPI journal article supplement (doi:10.3390/jof8020183), 2022-02-12
Supplement: s1 [file s1]

|     |    |    |    |    |    |    |    |    |   |   |    |    |
|-----|----|----|----|----|----|----|----|----|---|---|----|----|
| 241 | 21 | 21 | 39 | 39 | 27 | 27 | 12 | 15 | 8 | 8 | 7  | 7  |
| 254 | 24 | 25 | 35 | 39 | 27 | 27 | 9  | 12 | 8 | 8 | 7  | 7  |
| 229 | 24 | 25 | 35 | 39 | 27 | 27 | 9  | 12 | 8 | 8 | 7  | 7  |
| 231 | 24 | 24 | 29 | 29 | 26 | 26 | 13 | 13 | 8 | 8 | 7  | 7  |
| 223 | 24 | 24 | 29 | 29 | 26 | 26 | 13 | 13 | 8 | 8 | 7  | 7  |
| 194 | 24 | 24 | 29 | 29 | 41 | 41 | 8  | 8  | 8 | 8 | 7  | 7  |
| 185 | 21 | 21 | 39 | 39 | 27 | 27 | 9  | 9  | 8 | 8 | 7  | 7  |
| 162 | 24 | 24 | 24 | 24 | 26 | 26 | 12 | 12 | 8 | 8 | 7  | 7  |
| 147 | 25 | 25 | 30 | 30 | 18 | 18 | 12 | 12 | 8 | 8 | 12 | 12 |
| 125 | 24 | 25 | 28 | 28 | 55 | 55 | 12 | 12 | 8 | 8 | 7  | 13 |
| 117 | 24 | 24 | 25 | 29 | 45 | 45 | 8  | 8  | 8 | 8 | 7  | 7  |
| 104 | 25 | 25 | 30 | 30 | 18 | 18 | 12 | 12 | 8 | 8 | 12 | 12 |
| 103 | 24 | 24 | 25 | 29 | 45 | 45 | 8  | 8  | 8 | 8 | 7  | 7  |
| 83  | 25 | 25 | 25 | 26 | 28 | 28 | 12 | 12 | 8 | 8 | 7  | 7  |
| 82  | 24 | 24 | 29 | 29 | 26 | 32 | 12 | 12 | 8 | 8 | 7  | 7  |
| 77  | 24 | 24 | 27 | 27 | 31 | 31 | 12 | 12 | 8 | 8 | 4  | 7  |
| 69  | 24 | 24 | 36 | 37 | 40 | 40 | 8  | 8  | 8 | 8 | 7  | 7  |
| 186 | 26 | 26 | 34 | 34 | 56 | 56 | 12 | 12 | 8 | 8 | 7  | 7  |
| 265 | 24 | 25 | 28 | 28 | 27 | 56 | 12 | 12 | 8 | 8 | 13 | 13 |
| 281 | 23 | 25 | 30 | 30 | 27 | 27 | 9  | 9  | 8 | 8 | 7  | 7  |
| 291 | 24 | 25 | 35 | 39 | 27 | 27 | 9  | 12 | 8 | 8 | 7  | 7  |
| 292 | 17 | 32 | 22 | 27 | 26 | 26 | 13 | 13 | 8 | 8 | 7  | 9  |
| 293 | 24 | 25 | 28 | 33 | 56 | 66 | 12 | 12 | 8 | 8 | 7  | 7  |
| 295 | 25 | 33 | 30 | 30 | 27 | 34 | 12 | 12 | 8 | 8 | 7  | 7  |
| 296 | 24 | 25 | 28 | 33 | 56 | 66 | 12 | 12 | 8 | 8 | 13 | 17 |
| 341 | 24 | 25 | 35 | 36 | 45 | 46 | 8  | 8  | 8 | 8 | 7  | 13 |
| 351 | 25 | 26 | 30 | 30 | 32 | 32 | 12 | 12 | 8 | 8 | 3  | 3  |
| 359 | 24 | 25 | 30 | 30 | 27 | 34 | 9  | 14 | 8 | 8 | 7  | 7  |
| 360 | 26 | 26 | 30 | 30 | 27 | 27 | 9  | 9  | 8 | 8 | 7  | 7  |
| 363 | 24 | 24 | 38 | 38 | 40 | 40 | 8  | 8  | 8 | 8 | 7  | 7  |
| 371 | 24 | 25 | 26 | 26 | 49 | 49 | 8  | 8  | 8 | 8 | 7  | 7  |
| 427 | 24 | 24 | 50 | 54 | 27 | 27 | 12 | 12 | 8 | 8 | 7  | 7  |
| 529 | 24 | 26 | 30 | 30 | 27 | 27 | 9  | 14 | 8 | 8 | 7  | 7  |
| 582 | 24 | 24 | 37 | 37 | 49 | 49 | 8  | 8  | 8 | 8 | 7  | 7  |
| 685 | 24 | 24 | 38 | 49 | 40 | 40 | 8  | 8  | 8 | 8 | 7  | 7  |
| 706 | 24 | 24 | 38 | 38 | 40 | 46 | 8  | 8  | 8 | 8 | 7  | 7  |
| 723 | 24 | 24 | 37 | 37 | 40 | 40 | 8  | 8  | 8 | 8 | 7  | 7  |
| 747 | 24 | 24 | 29 | 34 | 41 | 41 | 8  | 8  | 8 | 8 | 7  | 7  |
| 748 | 24 | 25 | 30 | 30 | 27 | 27 | 9  | 12 | 8 | 8 | 7  | 7  |
| 766 | 25 | 25 | 14 | 30 | 33 | 34 | 9  | 14 | 8 | 8 | 7  | 7  |
| 770 | 24 | 24 | 29 | 37 | 40 | 40 | 8  | 8  | 8 | 8 | 7  | 7  |
| 784 | 24 | 24 | 29 | 29 | 41 | 41 | 8  | 8  | 8 | 8 | 7  | 7  |
| 795 | 25 | 25 | 14 | 30 | 33 | 34 | 9  | 14 | 8 | 8 | 7  | 7  |

|     |    |    |    |    |    |    |    |    |   |   |    |    |
|-----|----|----|----|----|----|----|----|----|---|---|----|----|
| 796 | 25 | 26 | 30 | 30 | 27 | 40 | 12 | 14 | 8 | 8 | 12 | 12 |
| 797 | 24 | 24 | 37 | 38 | 40 | 40 | 8  | 8  | 8 | 8 | 7  | 7  |
| 799 | 24 | 24 | 37 | 38 | 40 | 40 | 8  | 8  | 8 | 8 | 7  | 7  |
| 800 | 24 | 24 | 37 | 38 | 40 | 40 | 8  | 8  | 8 | 8 | 7  | 7  |
| 801 | 24 | 24 | 37 | 38 | 40 | 40 | 8  | 8  | 8 | 8 | 7  | 7  |
| 802 | 24 | 24 | 37 | 38 | 40 | 40 | 8  | 8  | 8 | 8 | 7  | 7  |
| 650 | 24 | 31 | 23 | 37 | 48 | 48 | 8  | 8  | 8 | 8 | 7  | 7  |
| 811 | 24 | 24 | 29 | 33 | 26 | 32 | 12 | 12 | 8 | 8 | 7  | 7  |
| 749 | 24 | 24 | 29 | 33 | 26 | 32 | 12 | 12 | 8 | 8 | 7  | 7  |
| 740 | 21 | 24 | 30 | 31 | 41 | 55 | 8  | 8  | 8 | 8 | 7  | 8  |
| 602 | 24 | 31 | 23 | 37 | 48 | 48 | 8  | 8  | 8 | 8 | 7  | 7  |
| 711 | 23 | 25 | 25 | 25 | 26 | 26 | 12 | 12 | 8 | 8 | 7  | 7  |

1. Diab-Elschahawi M, Forstner C, Hagen F, Meis JF, Lassnig AM, Prestler E, et al. Microsatellite genotyping clarified conspicuous accumulation of *Candida parapsilosis* at a cardio-thoracic surgery intensive care unit. *J Clin Microbiol.* **2012**;50:3422–6. DOI: 10.1128/JCM.01179-12
