# Supplementary material for: Candidemia among Hospitalized Pediatric Patients Caused by Several Clonal Lineages of Candida parapsilosis
Source: J Fungi (Basel). 2022 Feb 12;8(2):183. doi: 10.3390/jof8020183 (PMC8880282; doi:10.3390/jof8020183)
Supplement: Supplementary file 1 [file jof-08-00183-s001.zip]

Archive with 4 entries (4 files):
- final Cparapsilosis typing - supp Figures.pdf
- final Cparapsilosis typing - Table S1.pdf
- final Cparapsilosis typing - Table S2.pdf
- final Cparapsilosis typing - Table S3.pdf
